# Supplementary material
Source: PubMed Central journal article supplement (PMC2253955)
Supplement: mmc1.pdf [file mmc1.pdf]

## Supplemental Data

### Linkage, Association, and Gene-Expression Analyses

#### Identify *CNTNAP2* as an Autism-Susceptibility Gene

Maricela Alarcón, Brett S. Abrahams, Jennifer L. Stone, Jacqueline A. Duvall, Julia V. Perederiy, Jamee M. Bomar, Jonathan Sebat, Michael Wigler, Christa L. Martin, David H. Ledbetter, Stanley F. Nelson, Rita M. Cantor, and Daniel H. Geschwind

#### Supplemental References

S1. Bakkaloglu, B., O'Roak, B.J., Louvi, A., Gupta, A.R., Abelson, J.F., Morgan, T.M., Chawarska, K., Klin, A., Ercan-Sencicek, A.G., Stillman, A.A., et al. (2008). Molecular cytogenetic analysis and resequencing of *Contactin Associated Protein-Like 2* in autism spectrum disorder. *Am. J. Hum. Genet.* 82, this issue.

S2. Arking, D.E., Cutler, D.J., Brune, C.W., Teslovich, T.M., West, K., Ikeda, M., Rea, A., Guy, M., Lin, S., Cook, E.H., Jr., and Chakravarti, A. (2008). A common genetic variant in the neurexin superfamily member *CNTNAP2* increases familial risk of autism. *Am. J. Hum. Genet.* 82, this issue.

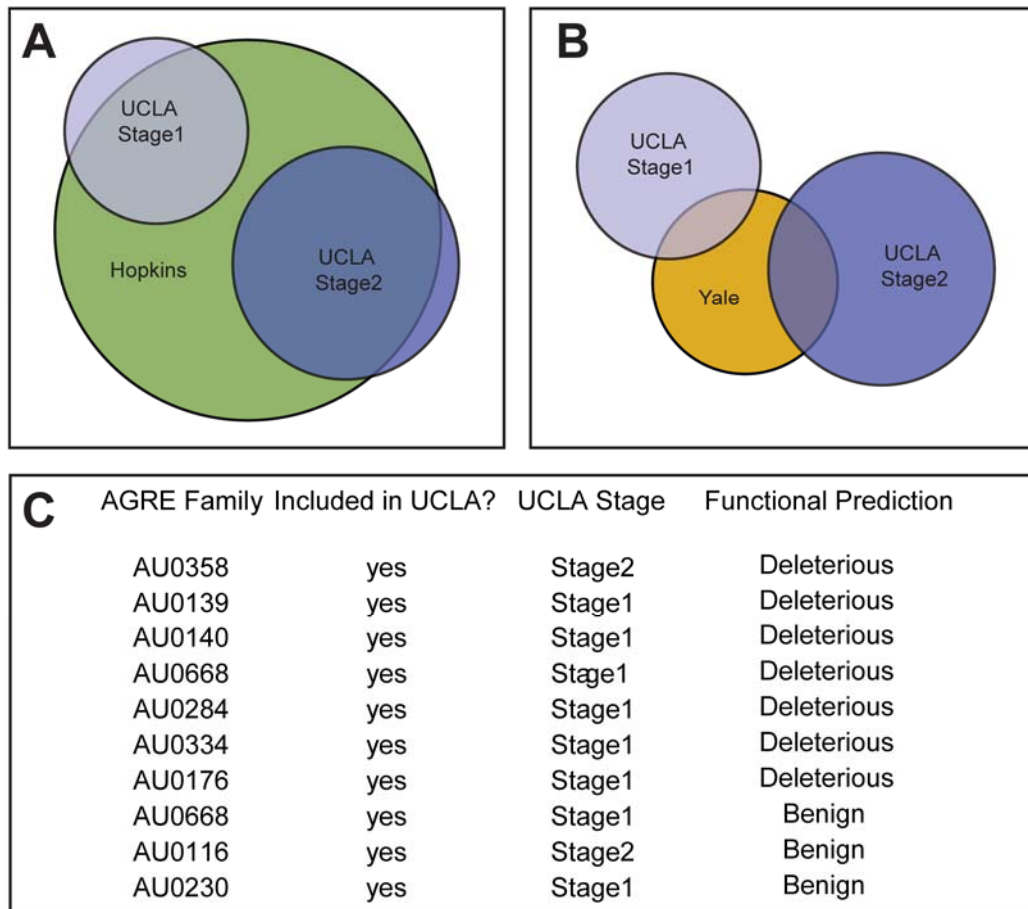

**Figure S1. Sample Overlap for UCLA, Yale,<sup>S1</sup> and Hopkins<sup>S2</sup> Studies**

(A) UCLA vs. Yale

19.3% (326 / 1693) samples used in the UCLA analyses were present in the Yale cohort. Sample overlap for Stage1 and Stage2 analyses was comparable at 16.8%

(113 / 672) and 20.9% (213/1021), respectively. Only 7.1% (8 / 113) of UCLA Stage 1 families sequenced in the Yale study were identified as having a rare *CNTNAP2* coding variant. Similarly, under 1% (2 / 213) of Stage 2 families sequenced in the Yale study had rare coding variants. Together these results suggest that rare *CNTNAP2* coding variants do not in themselves explain the association with WORD.

(B) UCLA vs. Hopkins

86.9% (1472 / 1693) samples used in the UCLA analyses were present in the HOPKINS cohort. Sample overlap for Stage1 and Stage2 analyses was comparable at 83.2% (559 / 672) and 89.4% (913 / 1021), respectively.

(C) Only 7.1% (8/113) of UCLA Stage 1 families sequenced in the Yale study were identified as having a rare *CNTNAP2* coding variant. Similarly, under 1% (2/213) of Stage 2 families sequenced in the Yale study had rare coding variants. Together these results suggest that rare *CNTNAP2* coding variants do not in themselves explain the association with WORD.
